# Supplementary material for: Controlling the electric permittivity of honeycomb-like core–shell Ni/CuSiO3 composite nanospheres to enhance microwave absorption properties
Source: Royal Society of Chemistry journal article supplement (doi:10.1039/c9ra08513k), 2020-01-01
Supplement: c9ra08513k1.pdf [file c9ra08513k1.pdf]

## Supporting Information

### **Controlling the electric permittivity of honeycomb-like core-shell Ni/CuSiO<sub>3</sub> composite nanospheres to enhance microwave absorption properties**

Rambabu Kuchi<sup>a,b,c,1</sup>, Taha Latif<sup>a,1</sup>, Sung Woo Lee<sup>a</sup>, Viet Dongquoc<sup>a</sup>, Phuoc Cao Van<sup>a</sup>, Dongsoo Kim<sup>b,c</sup>, Jong-Ryul Jeong<sup>a,\*</sup>

<sup>a</sup> *Department of Materials Science and Engineering, Graduate School of Energy Science and Technology, Chungnam National University, Daejeon 34134, South Korea*

<sup>b</sup> *Powder & Ceramics Division, Korea Institute of Materials Science, Changwon, Gyeongnam 51508, South Korea*

<sup>c</sup> *Convergence research center for development of mineral resources, Korea Institute of Geoscience and Mineral Resources, Daejeon 34132, South Korea*

\*Corresponding author: Tel: +82-42-821-6633, Fax: +82-42-822-5850

E-mail: jrjeong@cnu.ac.kr (J.-R. Jeong)

<sup>1</sup> These authors contributed equally to this work.

## Supporting Information

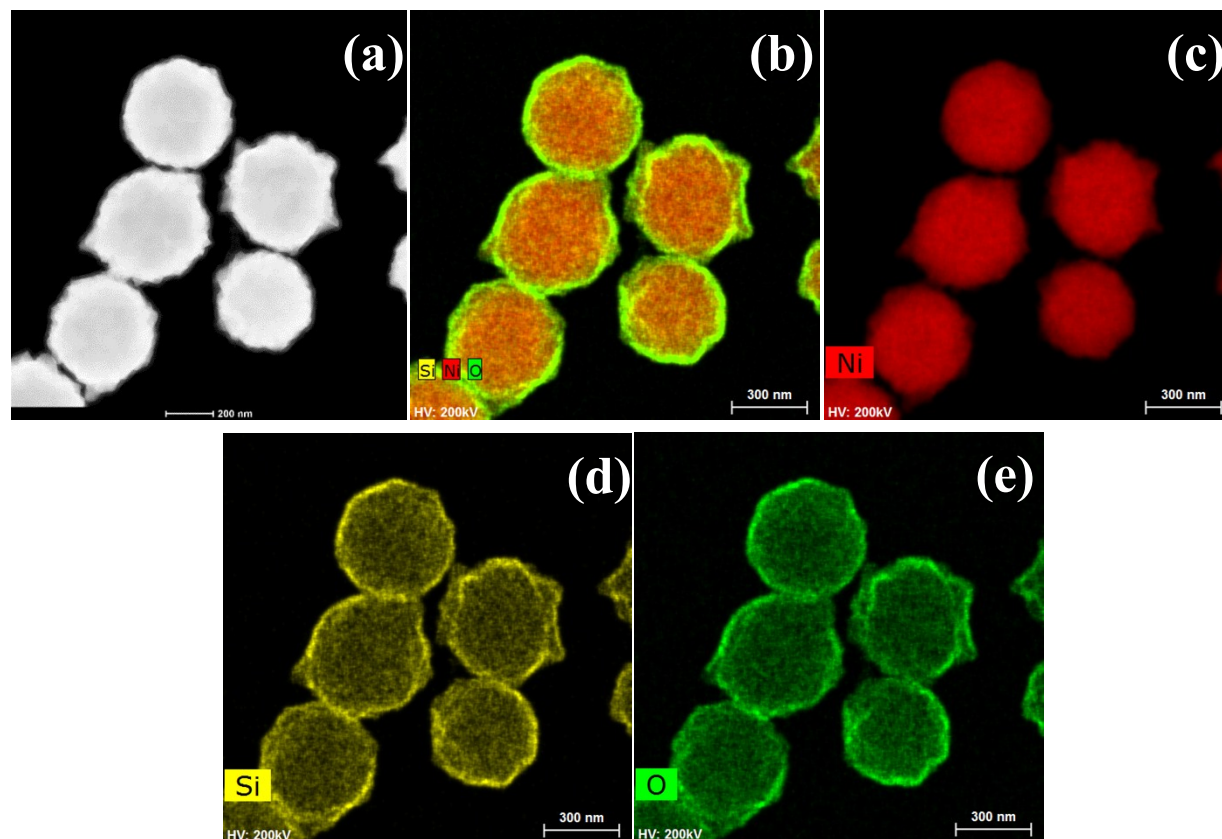

Figure S1. Images of Ni/SiO<sub>2</sub> nanospheres. (a) Bright-field high-angle angular dark-field STEM image and (b–e) elemental maps.

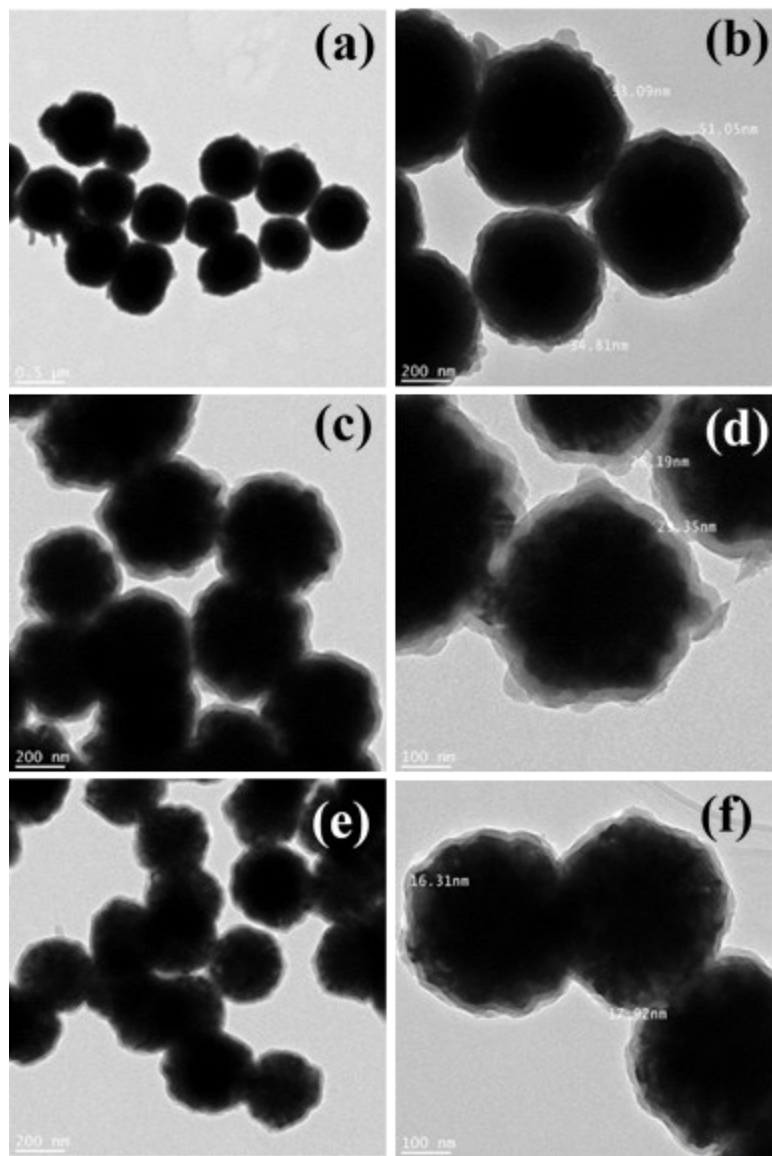

Figure S2. Ni/SiO<sub>2</sub> nanospheres prepared with Ni concentrations of (a, b) 0.3 g, (c, d) 0.5 g, and (e, f) 0.6 g.

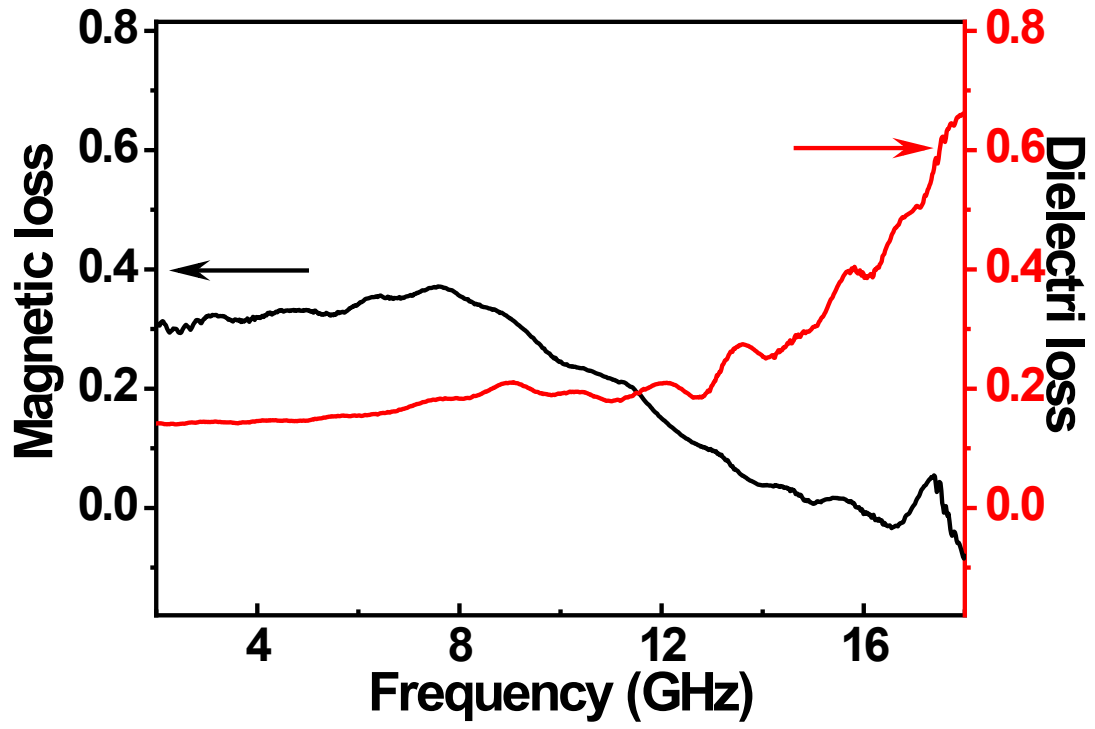

Figure S3. Loss tangents of the core-shell Ni/CuSiO<sub>3</sub> composite nanospheres.

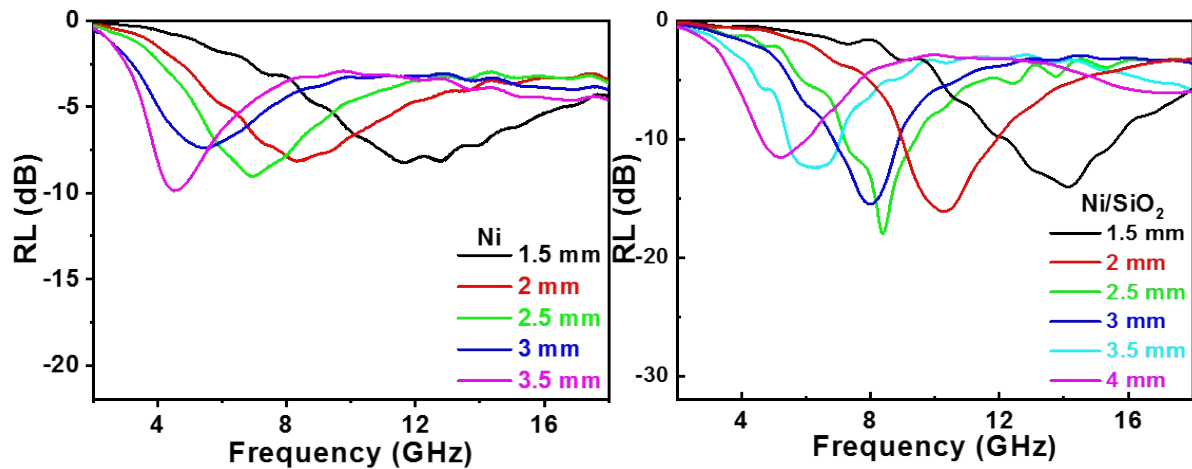

Figure S4. Ni/SiO<sub>2</sub> nanospheres prepared with Ni concentrations of (a, b) 0.3 g, (c, d) 0.5 g, and (e, f) 0.6 g.
